# Supplementary material for: Plastid phylogenomics of Pleurothallidinae (Orchidaceae): Conservative plastomes, new variable markers, and comparative analyses of plastid, nuclear, and mitochondrial data
Source: PubMed Central journal article supplement (PMC8396723; doi:10.1371/journal.pone.0256126), 2021-08-27
Supplement: pone.0256126.s007.pdf [file pone.0256126.s007.pdf]

| Subtribe          | Affinity             | Taxon                                                                 | Voucher                             | GenBank accession (plastome) | GenBank accession (nrDNA) | GenBank accession (mtDNA)     |
|-------------------|----------------------|-----------------------------------------------------------------------|-------------------------------------|------------------------------|---------------------------|-------------------------------|
| Laeliinae         | -                    | <i>Cattleya crispata</i> (Thunb.) Van den Berg                        | unvouchered                         | KP168671                     | -                         | -                             |
| Laeliinae         | -                    | <i>Cattleya liliputana</i> (Pabst) Van den Berg                       | unvouchered                         | KP202881                     | -                         | -                             |
| Pleurothallidinae | <i>Acianthera</i>    | <i>Acianthera recurva</i> (Lindl.) Pridgeon & M.W. Chase              | D.C. Imig 500 (UPCB)                | <b>MW375123</b>              | <b>MW364931</b>           | <b>MW562896–<br/>MW562941</b> |
| Pleurothallidinae | <i>Lepanthes</i>     | <i>Anathallis microphyta</i> (Barb. Rodr.) C.O.Azevedo & Van den Berg | M.C. Santos 25 (UPCB)               | <b>MW375124</b>              | <b>MW364932</b>           | <b>MW562942–<br/>MW563001</b> |
| Pleurothallidinae | <i>Lepanthes</i>     | <i>Anathallis obovata</i> (Lindl.) Pridgeon & M.W. Chase              | M.C. Santos 22 (UPCB)               | MH979332                     | <b>MW364933</b>           | <b>MW563002–<br/>MW563053</b> |
| Pleurothallidinae | <i>Masdevallia</i>   | <i>Masdevallia picturata</i> Rchb. f.                                 | unvouchered                         | KJ566305                     | -                         | -                             |
| Pleurothallidinae | <i>Octomeria</i>     | <i>Octomeria grandiflora</i> Lindl.                                   | D.C. Imig 503 (UPCB)                | <b>MW375128</b>              | <b>MW364937</b>           | <b>MW563178–<br/>MW563221</b> |
| Pleurothallidinae | <i>Pleurothallis</i> | <i>Pabstiella mirabilis</i> (Schltr.) Brieger & Senghas               | A.L.V. Toscano de Brito 3287 (UPCB) | <b>MW375130</b>              | <b>MW364938</b>           | <b>MW563222–<br/>MW563270</b> |
| Pleurothallidinae | <i>Pleurothallis</i> | <i>Stelis grandiflora</i> Lindl.                                      | M.E. Engels 1600 (UPCB)             | <b>MW375129</b>              | <b>MW364939</b>           | <b>MW563271–<br/>MW563320</b> |
| Pleurothallidinae | <i>Pleurothallis</i> | <i>Stelis montserratii</i> (Porsch) Karremans                         | D.C. Imig 410 (UPCB)                | <b>MW375125</b>              | <b>MW364934</b>           | <b>MW563054–<br/>MW563091</b> |
| Pleurothallidinae | <i>Restrepia</i>     | <i>Myoxanthus exasperatus</i> (Lindl.) Luer                           | T.F. Santos 326 (UPCB)              | <b>MW375127</b>              | <b>MW364936</b>           | <b>MW563137–<br/>MW563177</b> |
| Pleurothallidinae | <i>Specklinia</i>    | <i>Dryadella lilliputiana</i> (Cogn.) Luer                            | D.C. Imig 469 (UPCB)                | <b>MW375126</b>              | <b>MW364935</b>           | <b>MW563092–<br/>MW563136</b> |
