# Supplementary material for: Plastid phylogenomics of Pleurothallidinae (Orchidaceae): Conservative plastomes, new variable markers, and comparative analyses of plastid, nuclear, and mitochondrial data
Source: PubMed Central journal article supplement (PMC8396723; doi:10.1371/journal.pone.0256126), 2021-08-27
Supplement: pone.0256126.s008.pdf [file pone.0256126.s008.pdf]

| <b>Taxon</b>                  | <b># raw reads</b> | <b>Raw reads mean length (bp)</b> | <b># post-trim reads</b> | <b>Post-trim reads mean length (bp)</b> | <b># reads mapped to plastomes</b> | <b>Plastome mean coverage (x)</b> | <b># raw reads mapped to mitochondrion</b> | <b>mtDNA mean coverage (x)</b> | <b># raw reads mapped to nrDNA operon</b> | <b>nrDNA operon mean coverage (x)</b> |
|-------------------------------|--------------------|-----------------------------------|--------------------------|-----------------------------------------|------------------------------------|-----------------------------------|--------------------------------------------|--------------------------------|-------------------------------------------|---------------------------------------|
| <i>Acianthera recurva</i>     | 614,726            | 179.22                            | 604,109                  | 179.38                                  | 57,687<br>(09.56%)                 | 68.3                              | 34,916<br>(05.68%)                         | 112.1                          | 976<br>(00.16%)                           | 23.9                                  |
| <i>Anathallis microphyta</i>  | 1,331,958          | 127.44                            | 1,221,040                | 130.71                                  | 266,857<br>(22.72%)                | 195.3                             | 110,533<br>(08.30%)                        | 35.5                           | 4,472<br>(00.33%)                         | 65.1                                  |
| <i>Anathallis obovata</i>     | 1,378,972          | *                                 | *                        | *                                       | *                                  | *                                 | 75,501<br>(05.47%)                         | 30.5                           | 3,207<br>(00.23%)                         | 59.6                                  |
| <i>Dryadella lilliputiana</i> | 1,284,838          | 159.42                            | 1,239,756                | 161.73                                  | 230,188<br>(18.58%)                | 241.2                             | 112,230<br>(08.73%)                        | 62.4                           | 4,647<br>(00.36%)                         | 95.4                                  |
| <i>Myoxanthus exasperatus</i> | 898,306            | 130.75                            | 839,586                  | 134.70                                  | 189,429<br>(22.64%)                | 163.7                             | 92,521<br>(10.30%)                         | 71.2                           | 3,745<br>(00.41%)                         | 58.9                                  |
| <i>Octomeria grandiflora</i>  | 1,142,910          | 167.76                            | 1,095,295                | 171.23                                  | 121,474<br>(11.11%)                | 133.5                             | 53,065<br>(04.64%)                         | 29.0                           | 2,630<br>(00.23%)                         | 52.7                                  |
| <i>Pabstiella mirabilis</i>   | 1,231,612          | 171.72                            | 1,195,781                | 172.83                                  | 60,445<br>(05.10%)                 | 182.9                             | 40,170<br>(03.26%)                         | 24.0                           | 6,036<br>(00.49%)                         | 135.4                                 |
| <i>Stelis grandiflora</i>     | 1,120,894          | 138.39                            | 1,046,794                | 143.58                                  | 150,757<br>(14.42%)                | 135.7                             | 62,856<br>(05.61%)                         | 27.0                           | 2,689<br>(00.24%)                         | 47.7                                  |
| <i>Stelis montserratii</i>    | 826,542            | 188.57                            | 816,984                  | 187.57                                  | 116,542<br>(14.29%)                | 131.8                             | 56,799<br>(06.87%)                         | 57.8                           | 683<br>(00.08%)                           | 16.6                                  |
