# Supplementary material for: Plastid phylogenomics of Pleurothallidinae (Orchidaceae): Conservative plastomes, new variable markers, and comparative analyses of plastid, nuclear, and mitochondrial data
Source: PubMed Central journal article supplement (PMC8396723; doi:10.1371/journal.pone.0256126), 2021-08-27
Supplement: pone.0256126.s009.pdf [file pone.0256126.s009.pdf]

| <b>Gene groups</b>                   | <b>Gene names</b>                                                                             |
|--------------------------------------|-----------------------------------------------------------------------------------------------|
| <b>Ribosomal RNA</b>                 | <i>5S, 18S, 26S</i>                                                                           |
| <b>Transport RNA</b>                 | <i>trnE –UUC, trnK –UUU, trnL –UAA, trnM –CAU, trnQ –UUG, trnR –GCG, trnY –AUA, trnY –GUA</i> |
| <b>Ribosome small subunit</b>        | <i>rps12</i>                                                                                  |
| <b>Maturase</b>                      | <i>matR</i>                                                                                   |
| <b>Apocytochrome b</b>               | <i>cob</i>                                                                                    |
| <b>Cytochrome c biosynthesis</b>     | <i>ccmB, ccmC, ccmFc*, ccmFN1, ccmFN2</i>                                                     |
| <b>Cytochrome c oxidase subunits</b> | <i>cox1, cox2*, cox3</i>                                                                      |
| <b>ATP synthase subunits</b>         | <i>atp1, atp4, atp6, atp8, atp9</i>                                                           |
| <b>NADH dehydrogenase subunits</b>   | <i>nad1*, nad2*, nad3, nad4*, nad4L, nad5*, nad6, nad7*, nad9</i>                             |
| <b>Transport membrane protein</b>    | <i>mtb</i>                                                                                    |
