# Supplementary material for: Plastid phylogenomics of Pleurothallidinae (Orchidaceae): Conservative plastomes, new variable markers, and comparative analyses of plastid, nuclear, and mitochondrial data
Source: PubMed Central journal article supplement (PMC8396723; doi:10.1371/journal.pone.0256126), 2021-08-27
Supplement: pone.0256126.s010.pdf [file pone.0256126.s010.pdf]

| Gene groups                                     | Gene names                                                                                                                                                                                                                                                                                                                                                                                                                                                                                         |
|-------------------------------------------------|----------------------------------------------------------------------------------------------------------------------------------------------------------------------------------------------------------------------------------------------------------------------------------------------------------------------------------------------------------------------------------------------------------------------------------------------------------------------------------------------------|
| <b>Ribosomal RNA</b>                            | <i>rrn4.5<sup>b</sup>; rrn5<sup>b</sup>; rrn16<sup>b</sup>; rrn23<sup>b</sup></i>                                                                                                                                                                                                                                                                                                                                                                                                                  |
| <b>Transport RNA</b>                            | <i>trnA –UGC<sup>ab</sup>; trnC –GCA; trnD –GUC; trnE –UUC; trnF –GAA; trnfM –CAU; trnG –GCC; trnG –UCC<sup>a</sup>; trnH –GUG<sup>b</sup>; trnI –CAU<sup>b</sup>; trnI –GAU<sup>ab</sup>; trnK –UUU<sup>a</sup>; trnL –CAA<sup>b</sup>; trnL –UAA<sup>a</sup>; trnL –UAG; trnM –CAU; trnN –GUU<sup>b</sup>; trnP –UGG; trnQ –UUG; trnR –ACG<sup>b</sup>; trnR –UCU; trnS –GCU; trnS –GGA; trnS –UGA; trnT –GGU; trnT –UGU; trnV –GAC<sup>b</sup>; trnV –UAC<sup>a</sup>; trnW –CCA; trnY –GUA</i> |
| <b>Ribosome small subunit</b>                   | <i>rps2; rps3; rps4; rps7<sup>b</sup>; rps8; rps11; rps12<sup>ab</sup>; rps14; rps15; rps16<sup>a</sup>; rps18; rps19<sup>b</sup></i>                                                                                                                                                                                                                                                                                                                                                              |
| <b>Ribosome large subunit</b>                   | <i>rpl2<sup>ab</sup>; rpl14; rpl16<sup>a</sup>; rpl20; rpl22; rpl23<sup>b</sup>; rpl32; rpl33; rpl36</i>                                                                                                                                                                                                                                                                                                                                                                                           |
| <b>RNA-polimerase</b>                           | <i>rpoA; rpoB; rpoC1<sup>a</sup>; rpoC2</i>                                                                                                                                                                                                                                                                                                                                                                                                                                                        |
| <b>Translation initiation factor</b>            | <i>infA</i>                                                                                                                                                                                                                                                                                                                                                                                                                                                                                        |
| <b>Maturase</b>                                 | <i>matK</i>                                                                                                                                                                                                                                                                                                                                                                                                                                                                                        |
| <b>Photosystem I (PSI) subunits</b>             | <i>psaA; psaB; psaC; psaI; psaJ; ycf3<sup>a</sup>; ycf4</i>                                                                                                                                                                                                                                                                                                                                                                                                                                        |
| <b>Photosystem II (PSII) subunits</b>           | <i>psbA; psbB; psbC; psbD; psbE; psbF; psbH; psbI; psbJ; psbK; psbL; psbM; psbN; psbT; psbZ</i>                                                                                                                                                                                                                                                                                                                                                                                                    |
| <b>Cytochrome <i>b<sub>6</sub></i> subunits</b> | <i>petA; petB<sup>a</sup>; petD<sup>a</sup>; petG; petL; petN</i>                                                                                                                                                                                                                                                                                                                                                                                                                                  |
| <b>ATP synthase subunits</b>                    | <i>atpA; atpB; atpE; atpF; atpH; atpI</i>                                                                                                                                                                                                                                                                                                                                                                                                                                                          |
| <b>NADH dehydrogenase subunits*</b>             | <i>ndhA<sup>a</sup>; ndhB<sup>ab</sup>; ndhC; ndhD; ndhE; ndhF; ndhG; ndhH; ndhI; ndhJ; ndhK</i>                                                                                                                                                                                                                                                                                                                                                                                                   |
| <b>Rubisco</b>                                  | <i>rbcL</i>                                                                                                                                                                                                                                                                                                                                                                                                                                                                                        |
| <b>Chloroplast envelope membrane protein</b>    | <i>cemA</i>                                                                                                                                                                                                                                                                                                                                                                                                                                                                                        |
| <b>Acetyl-CoA carboxylase beta subunit</b>      | <i>accD</i>                                                                                                                                                                                                                                                                                                                                                                                                                                                                                        |
| <b>Cytochrome c biogenesis protein</b>          | <i>ccsA</i>                                                                                                                                                                                                                                                                                                                                                                                                                                                                                        |
| <b>Clp protease subunit</b>                     | <i>clpP<sup>a</sup></i>                                                                                                                                                                                                                                                                                                                                                                                                                                                                            |
| <b>TIC complex component</b>                    | <i>ycf1<sup>c</sup></i>                                                                                                                                                                                                                                                                                                                                                                                                                                                                            |
| <b>Unknown function</b>                         | <i>ycf2<sup>b</sup></i>                                                                                                                                                                                                                                                                                                                                                                                                                                                                            |
