# Supplementary material for: Plastid phylogenomics of Pleurothallidinae (Orchidaceae): Conservative plastomes, new variable markers, and comparative analyses of plastid, nuclear, and mitochondrial data
Source: PubMed Central journal article supplement (PMC8396723; doi:10.1371/journal.pone.0256126), 2021-08-27
Supplement: pone.0256126.s011.pdf [file pone.0256126.s011.pdf]

| <b>Dataset</b>                | <b>IR</b> | <b>LSC</b> | <b>SSC</b> | <b>Total</b> |
|-------------------------------|-----------|------------|------------|--------------|
| <b>Pleurothallidinae</b>      | 134       | 1,899      | 384        | 2,417        |
| <i>Acianthera recurva</i>     | 29        | 383        | 71         | 483          |
| <i>Anathallis microphyta</i>  | 26        | 330        | 62         | 418          |
| <i>Anathallis obovata</i>     | 24        | 263        | 46         | 333          |
| <i>Dryadella lilliputiana</i> | 24        | 325        | 72         | 421          |
| <i>Myoxanthus exasperatus</i> | 21        | 323        | 56         | 400          |
| <i>Octomeria grandiflora</i>  | 30        | 336        | 53         | 419          |
| <i>Pabstiella mirabilis</i>   | 23        | 307        | 64         | 394          |
| <i>Stelis grandiflora</i>     | 20        | 300        | 56         | 376          |
| <i>Stelis montserratii</i>    | 19        | 283        | 49         | 351          |
