# Supplementary material for: Plastid phylogenomics of Pleurothallidinae (Orchidaceae): Conservative plastomes, new variable markers, and comparative analyses of plastid, nuclear, and mitochondrial data
Source: PubMed Central journal article supplement (PMC8396723; doi:10.1371/journal.pone.0256126), 2021-08-27
Supplement: pone.0256126.s012.pdf [file pone.0256126.s012.pdf]

| AA  | Codon | ACIRE |      | ANAMI |      | ANAOB |      | DRYLI |      | MASPI |      | MYOEX |      | OCTGR |      | PABMI |      | STEGR |      | STEMO |      |
|-----|-------|-------|------|-------|------|-------|------|-------|------|-------|------|-------|------|-------|------|-------|------|-------|------|-------|------|
|     |       | RF    | RSCU | RF    | RSCU | RF    | RSCU | RF    | RSCU | RF    | RF   | RSCU  | RSCU | RF    | RSCU | RF    | RSCU | RF    | RSCU | RF    | RSCU |
| Ala | GCA   | 1.63  | 1.21 | 1.61  | 1.19 | 1.65  | 1.20 | 1.59  | 1.19 | 1.65  | 1.64 | 1.22  | 1.22 | 1.64  | 1.22 | 1.61  | 1.21 | 1.65  | 1.22 | 1.63  | 1.21 |
|     | GCC   | 0.73  | 0.54 | 0.73  | 0.54 | 0.76  | 0.55 | 0.74  | 0.56 | 0.75  | 0.75 | 0.56  | 0.55 | 0.75  | 0.56 | 0.75  | 0.56 | 0.76  | 0.56 | 0.76  | 0.57 |
|     | GCG   | 0.49  | 0.37 | 0.50  | 0.37 | 0.50  | 0.36 | 0.54  | 0.40 | 0.49  | 0.47 | 0.35  | 0.36 | 0.47  | 0.35 | 0.47  | 0.35 | 0.50  | 0.37 | 0.48  | 0.35 |
|     | GCT   | 2.51  | 1.87 | 2.57  | 1.90 | 2.58  | 1.88 | 2.48  | 1.85 | 2.51  | 2.49 | 1.86  | 1.86 | 2.50  | 1.86 | 2.50  | 1.87 | 2.50  | 1.84 | 2.52  | 1.86 |
| Arg | AGA   | 1.97  | 1.90 | 1.93  | 1.92 | 1.92  | 1.89 | 1.95  | 1.90 | 1.86  | 1.88 | 1.91  | 1.91 | 1.91  | 1.92 | 1.94  | 1.95 | 2.01  | 1.95 | 1.89  | 1.93 |
|     | AGG   | 0.64  | 0.62 | 0.59  | 0.59 | 0.62  | 0.61 | 0.63  | 0.62 | 0.57  | 0.58 | 0.59  | 0.59 | 0.58  | 0.59 | 0.59  | 0.59 | 0.59  | 0.58 | 0.58  | 0.59 |
|     | CGA   | 1.42  | 1.37 | 1.37  | 1.37 | 1.38  | 1.36 | 1.42  | 1.38 | 1.34  | 1.34 | 1.36  | 1.37 | 1.34  | 1.35 | 1.34  | 1.35 | 1.39  | 1.36 | 1.32  | 1.34 |
|     | CGC   | 0.36  | 0.35 | 0.33  | 0.33 | 0.34  | 0.34 | 0.32  | 0.32 | 0.34  | 0.35 | 0.35  | 0.35 | 0.33  | 0.33 | 0.31  | 0.32 | 0.34  | 0.33 | 0.34  | 0.35 |
|     | CGG   | 0.39  | 0.37 | 0.40  | 0.40 | 0.40  | 0.39 | 0.40  | 0.39 | 0.37  | 0.37 | 0.37  | 0.38 | 0.39  | 0.40 | 0.38  | 0.38 | 0.38  | 0.37 | 0.38  | 0.39 |
|     | CGT   | 1.44  | 1.39 | 1.39  | 1.38 | 1.41  | 1.39 | 1.41  | 1.37 | 1.36  | 1.38 | 1.40  | 1.39 | 1.39  | 1.40 | 1.39  | 1.40 | 1.44  | 1.40 | 1.37  | 1.40 |
| Asn | AAC   | 1.01  | 0.42 | 0.93  | 0.39 | 0.92  | 0.41 | 0.98  | 0.41 | 0.92  | 0.91 | 0.39  | 0.40 | 0.92  | 0.40 | 0.93  | 0.39 | 0.94  | 0.40 | 0.90  | 0.39 |
|     | AAT   | 3.77  | 1.58 | 3.79  | 1.60 | 3.60  | 1.59 | 3.76  | 1.59 | 3.73  | 3.73 | 1.60  | 1.60 | 3.71  | 1.60 | 3.77  | 1.60 | 3.76  | 1.60 | 3.72  | 1.61 |
| Asp | GAC   | 0.71  | 0.34 | 0.76  | 0.38 | 0.69  | 0.35 | 0.73  | 0.36 | 0.71  | 0.72 | 0.36  | 0.35 | 0.72  | 0.36 | 0.70  | 0.35 | 0.72  | 0.35 | 0.71  | 0.36 |
|     | GAT   | 3.40  | 1.65 | 3.27  | 1.62 | 3.30  | 1.65 | 3.30  | 1.63 | 3.29  | 3.26 | 1.64  | 1.64 | 3.27  | 1.64 | 3.27  | 1.65 | 3.36  | 1.64 | 3.26  | 1.64 |
| Cys | TGC   | 0.27  | 0.47 | 0.25  | 0.43 | 0.24  | 0.41 | 0.25  | 0.44 | 0.24  | 0.24 | 0.41  | 0.41 | 0.24  | 0.41 | 0.25  | 0.43 | 0.28  | 0.48 | 0.25  | 0.43 |
|     | TGT   | 0.87  | 1.53 | 0.90  | 1.57 | 0.92  | 1.58 | 0.90  | 1.56 | 0.92  | 0.93 | 1.59  | 1.58 | 0.93  | 1.58 | 0.93  | 1.57 | 0.90  | 1.52 | 0.91  | 1.57 |
| Gln | CAA   | 2.89  | 1.55 | 2.77  | 1.53 | 2.80  | 1.54 | 2.87  | 1.55 | 2.72  | 2.75 | 1.54  | 1.53 | 2.74  | 1.53 | 2.70  | 1.53 | 2.83  | 1.53 | 2.73  | 1.54 |
|     | CAG   | 0.84  | 0.45 | 0.84  | 0.46 | 0.83  | 0.46 | 0.83  | 0.45 | 0.83  | 0.81 | 0.46  | 0.47 | 0.83  | 0.47 | 0.82  | 0.47 | 0.87  | 0.47 | 0.81  | 0.45 |
| Glu | GAA   | 4.30  | 1.51 | 4.09  | 1.50 | 4.14  | 1.52 | 4.24  | 1.52 | 4.08  | 4.07 | 1.53  | 1.53 | 4.04  | 1.51 | 4.10  | 1.51 | 4.20  | 1.52 | 4.05  | 1.52 |
|     | GAG   | 1.37  | 0.48 | 1.34  | 0.49 | 1.28  | 0.47 | 1.32  | 0.47 | 1.26  | 1.26 | 0.47  | 0.47 | 1.31  | 0.49 | 1.32  | 0.49 | 1.33  | 0.48 | 1.27  | 0.48 |
| Gly | GGA   | 2.62  | 1.57 | 2.68  | 1.58 | 2.72  | 1.60 | 2.63  | 1.57 | 2.74  | 2.77 | 1.62  | 1.61 | 2.76  | 1.62 | 2.76  | 1.63 | 2.64  | 1.57 | 2.76  | 1.62 |
|     | GGC   | 0.68  | 0.40 | 0.68  | 0.40 | 0.68  | 0.40 | 0.66  | 0.39 | 0.65  | 0.64 | 0.37  | 0.38 | 0.65  | 0.38 | 0.63  | 0.37 | 0.69  | 0.41 | 0.66  | 0.39 |
|     | GGG   | 1.13  | 0.68 | 1.15  | 0.67 | 1.13  | 0.67 | 1.16  | 0.69 | 1.14  | 1.15 | 0.67  | 0.67 | 1.12  | 0.66 | 1.15  | 0.68 | 1.16  | 0.69 | 1.14  | 0.67 |
|     | GGT   | 2.25  | 1.34 | 2.28  | 1.34 | 2.27  | 1.33 | 2.23  | 1.33 | 2.24  | 2.26 | 1.32  | 1.32 | 2.26  | 1.33 | 2.21  | 1.31 | 2.24  | 1.33 | 2.24  | 1.32 |
| His | CAC   | 0.54  | 0.43 | 0.55  | 0.44 | 0.54  | 0.44 | 0.53  | 0.43 | 0.56  | 0.54 | 0.45  | 0.47 | 0.54  | 0.46 | 0.53  | 0.45 | 0.54  | 0.43 | 0.54  | 0.45 |
|     | CAT   | 1.98  | 1.57 | 1.93  | 1.55 | 1.92  | 1.56 | 1.94  | 1.57 | 1.80  | 1.83 | 1.54  | 1.52 | 1.82  | 1.54 | 1.81  | 1.54 | 1.97  | 1.57 | 1.85  | 1.54 |
| Ile | ATA   | 2.56  | 0.92 | 2.64  | 0.93 | 2.67  | 0.94 | 2.53  | 0.90 | 2.70  | 2.72 | 0.94  | 0.93 | 2.70  | 0.94 | 2.71  | 0.94 | 2.46  | 0.89 | 2.72  | 0.94 |
|     | ATC   | 1.64  | 0.59 | 1.68  | 0.59 | 1.67  | 0.59 | 1.66  | 0.59 | 1.69  | 1.67 | 0.58  | 0.58 | 1.73  | 0.60 | 1.69  | 0.59 | 1.69  | 0.61 | 1.68  | 0.58 |
|     | ATT   | 4.12  | 1.48 | 4.15  | 1.47 | 4.17  | 1.47 | 4.18  | 1.50 | 4.27  | 4.25 | 1.47  | 1.48 | 4.17  | 1.45 | 4.23  | 1.47 | 4.13  | 1.50 | 4.22  | 1.47 |
| Leu | CTA   | 1.45  | 0.85 | 1.38  | 0.80 | 1.41  | 0.81 | 1.41  | 0.81 | 1.44  | 1.44 | 0.82  | 0.82 | 1.42  | 0.81 | 1.44  | 0.82 | 1.38  | 0.81 | 1.47  | 0.84 |
|     | CTC   | 0.61  | 0.36 | 0.65  | 0.38 | 0.66  | 0.38 | 0.65  | 0.37 | 0.66  | 0.64 | 0.37  | 0.38 | 0.67  | 0.38 | 0.68  | 0.39 | 0.62  | 0.36 | 0.65  | 0.37 |
|     | CTG   | 0.68  | 0.40 | 0.67  | 0.39 | 0.68  | 0.39 | 0.69  | 0.40 | 0.71  | 0.67 | 0.38  | 0.40 | 0.67  | 0.39 | 0.66  | 0.37 | 0.72  | 0.42 | 0.69  | 0.40 |
|     | CTT   | 2.09  | 1.24 | 2.16  | 1.25 | 2.15  | 1.24 | 2.25  | 1.30 | 2.18  | 2.23 | 1.27  | 1.25 | 2.23  | 1.27 | 2.23  | 1.28 | 2.11  | 1.24 | 2.23  | 1.27 |
|     | TTA   | 3.19  | 1.89 | 3.36  | 1.96 | 3.40  | 1.96 | 3.34  | 1.93 | 3.47  | 3.42 | 1.95  | 1.98 | 3.41  | 1.95 | 3.43  | 1.96 | 3.28  | 1.92 | 3.44  | 1.96 |
|     | TTG   | 2.11  | 1.25 | 2.07  | 1.21 | 2.08  | 1.20 | 2.04  | 1.18 | 2.03  | 2.08 | 1.19  | 1.16 | 2.08  | 1.19 | 2.06  | 1.17 | 2.09  | 1.23 | 2.06  | 1.17 |

|             |            |      |      |      |      |      |      |      |      |      |      |      |      |      |      |      |      |      |      |      |      |
|-------------|------------|------|------|------|------|------|------|------|------|------|------|------|------|------|------|------|------|------|------|------|------|
| <b>Lys</b>  | <b>AAA</b> | 4.38 | 1.52 | 4.20 | 1.49 | 4.12 | 1.50 | 4.10 | 1.50 | 4.22 | 1.49 | 4.19 | 1.51 | 4.06 | 1.51 | 4.15 | 1.51 | 4.30 | 1.50 | 4.06 | 1.48 |
|             | <b>AAG</b> | 1.39 | 0.48 | 1.41 | 0.50 | 1.38 | 0.50 | 1.36 | 0.50 | 1.42 | 0.50 | 1.34 | 0.48 | 1.32 | 0.49 | 1.34 | 0.49 | 1.42 | 0.50 | 1.42 | 0.52 |
| <b>Met</b>  | <b>ATG</b> | 2.31 | 1.00 | 2.37 | 1.00 | 2.44 | 1.00 | 2.46 | 1.00 | 2.41 | 1.00 | 2.45 | 1.00 | 2.46 | 1.00 | 2.47 | 1.00 | 2.38 | 1.00 | 2.45 | 1.00 |
| <b>Phe</b>  | <b>TTC</b> | 1.96 | 0.70 | 2.09 | 0.72 | 2.01 | 0.70 | 2.01 | 0.69 | 1.99 | 0.70 | 1.97 | 0.68 | 2.01 | 0.69 | 2.03 | 0.70 | 1.99 | 0.70 | 2.01 | 0.69 |
|             | <b>TTT</b> | 3.64 | 1.30 | 3.73 | 1.28 | 3.70 | 1.29 | 3.81 | 1.31 | 0.36 | 1.29 | 3.82 | 1.32 | 3.78 | 1.30 | 3.78 | 1.30 | 3.64 | 1.29 | 3.79 | 1.30 |
| <b>Pro</b>  | <b>CCA</b> | 1.08 | 1.08 | 1.09 | 1.09 | 1.14 | 1.13 | 1.15 | 1.15 | 1.09 | 1.09 | 1.17 | 1.17 | 1.15 | 1.15 | 1.15 | 1.15 | 1.09 | 1.10 | 1.15 | 1.14 |
| <b>Pro</b>  | <b>CCC</b> | 0.90 | 0.90 | 0.88 | 0.89 | 0.87 | 0.86 | 0.87 | 0.87 | 0.91 | 0.91 | 0.85 | 0.84 | 0.88 | 0.87 | 0.86 | 0.86 | 0.88 | 0.89 | 0.87 | 0.86 |
|             | <b>CCG</b> | 0.44 | 0.44 | 0.41 | 0.41 | 0.43 | 0.42 | 0.41 | 0.41 | 0.45 | 0.45 | 0.41 | 0.41 | 0.42 | 0.42 | 0.42 | 0.42 | 0.44 | 0.44 | 0.41 | 0.41 |
|             | <b>CCT</b> | 1.57 | 1.57 | 1.58 | 1.59 | 1.60 | 1.58 | 1.56 | 1.56 | 1.54 | 1.54 | 1.58 | 1.57 | 1.56 | 1.55 | 1.58 | 1.57 | 1.53 | 1.55 | 1.60 | 1.57 |
| <b>Ser</b>  | <b>AGC</b> | 0.41 | 0.33 | 0.41 | 0.32 | 0.39 | 0.32 | 0.39 | 0.30 | 0.41 | 0.32 | 0.40 | 0.32 | 0.39 | 0.30 | 0.39 | 0.31 | 0.40 | 0.31 | 0.39 | 0.30 |
|             | <b>AGT</b> | 1.61 | 1.29 | 1.61 | 1.27 | 1.47 | 1.19 | 1.63 | 1.27 | 1.59 | 1.26 | 1.61 | 1.26 | 1.64 | 1.28 | 1.62 | 1.27 | 1.61 | 1.27 | 1.64 | 1.28 |
|             | <b>TCA</b> | 1.47 | 1.18 | 1.50 | 1.18 | 1.46 | 1.19 | 1.57 | 1.22 | 1.51 | 1.19 | 1.58 | 1.24 | 1.53 | 1.19 | 1.55 | 1.22 | 1.48 | 1.17 | 1.57 | 1.22 |
|             | <b>TCC</b> | 1.12 | 0.90 | 1.17 | 0.92 | 1.22 | 0.99 | 1.15 | 0.90 | 1.14 | 0.90 | 1.12 | 0.87 | 1.15 | 0.90 | 1.15 | 0.90 | 1.19 | 0.94 | 1.14 | 0.89 |
|             | <b>TCG</b> | 0.59 | 0.47 | 0.58 | 0.46 | 0.60 | 0.49 | 0.61 | 0.47 | 0.62 | 0.49 | 0.60 | 0.47 | 0.64 | 0.50 | 0.62 | 0.49 | 0.59 | 0.47 | 0.59 | 0.46 |
|             | <b>TCT</b> | 2.27 | 1.82 | 2.33 | 1.84 | 2.24 | 1.82 | 2.32 | 1.81 | 2.32 | 1.83 | 2.33 | 1.83 | 2.34 | 1.82 | 2.32 | 1.81 | 2.33 | 1.83 | 2.34 | 1.83 |
| <b>Stop</b> | <b>TAA</b> | 0.19 | 1.52 | 0.19 | 1.52 | 0.19 | 1.59 | 0.18 | 1.55 | 0.18 | 1.40 | 0.17 | 1.54 | 0.16 | 1.44 | 0.16 | 1.37 | 0.19 | 1.50 | 0.18 | 1.55 |
|             | <b>TAG</b> | 0.09 | 0.74 | 0.09 | 0.74 | 0.07 | 0.61 | 0.09 | 0.76 | 0.11 | 0.87 | 0.08 | 0.69 | 0.09 | 0.83 | 0.09 | 0.83 | 0.10 | 0.77 | 0.09 | 0.76 |
|             | <b>TGA</b> | 0.09 | 0.74 | 0.09 | 0.74 | 0.10 | 0.80 | 0.08 | 0.68 | 0.09 | 0.72 | 0.09 | 0.77 | 0.08 | 0.72 | 0.09 | 0.80 | 0.09 | 0.73 | 0.08 | 0.68 |
| <b>Thr</b>  | <b>ACA</b> | 1.56 | 1.23 | 1.54 | 1.22 | 1.60 | 1.25 | 1.57 | 1.23 | 1.57 | 1.25 | 1.53 | 1.21 | 1.55 | 1.22 | 1.54 | 1.22 | 1.50 | 1.20 | 1.57 | 1.24 |
|             | <b>ACC</b> | 0.89 | 0.70 | 0.90 | 0.71 | 0.88 | 0.69 | 0.89 | 0.70 | 0.87 | 0.69 | 0.87 | 0.69 | 0.89 | 0.70 | 0.90 | 0.71 | 0.88 | 0.70 | 0.87 | 0.69 |
|             | <b>ACG</b> | 0.56 | 0.45 | 0.52 | 0.41 | 0.53 | 0.41 | 0.52 | 0.41 | 0.52 | 0.41 | 0.52 | 0.41 | 0.54 | 0.42 | 0.54 | 0.43 | 0.51 | 0.41 | 0.54 | 0.42 |
|             | <b>ACT</b> | 2.04 | 1.61 | 2.11 | 1.66 | 2.12 | 1.65 | 2.11 | 1.66 | 2.06 | 1.64 | 2.12 | 1.68 | 2.09 | 1.65 | 2.04 | 1.62 | 2.11 | 1.69 | 2.08 | 1.64 |
| <b>Trp</b>  | <b>TGG</b> | 1.74 | 1.00 | 1.77 | 1.00 | 1.79 | 1.00 | 1.78 | 1.00 | 1.76 | 1.00 | 1.77 | 1.00 | 1.77 | 1.00 | 1.76 | 1.00 | 1.75 | 1.00 | 1.78 | 1.00 |
| <b>Tyr</b>  | <b>TAC</b> | 0.71 | 0.41 | 0.72 | 0.41 | 0.69 | 0.38 | 0.72 | 0.39 | 0.66 | 0.38 | 0.69 | 0.37 | 0.71 | 0.38 | 0.71 | 0.39 | 0.71 | 0.40 | 0.71 | 0.38 |
|             | <b>TAT</b> | 2.78 | 1.59 | 2.81 | 1.59 | 2.87 | 1.61 | 2.94 | 1.61 | 2.81 | 1.62 | 2.99 | 1.62 | 2.97 | 1.61 | 2.97 | 1.61 | 2.81 | 1.59 | 2.96 | 1.61 |
| <b>Val</b>  | <b>GTA</b> | 1.98 | 1.46 | 1.95 | 1.45 | 2.01 | 1.46 | 1.94 | 1.44 | 1.94 | 1.42 | 1.92 | 1.43 | 1.90 | 1.40 | 1.93 | 1.45 | 2.01 | 1.46 | 1.93 | 1.43 |
|             | <b>GTC</b> | 0.67 | 0.49 | 0.63 | 0.46 | 0.67 | 0.48 | 0.67 | 0.50 | 0.72 | 0.53 | 0.69 | 0.51 | 0.68 | 0.51 | 0.64 | 0.48 | 0.67 | 0.49 | 0.64 | 0.47 |
|             | <b>GTG</b> | 0.84 | 0.62 | 0.83 | 0.62 | 0.81 | 0.58 | 0.80 | 0.60 | 0.83 | 0.61 | 0.80 | 0.59 | 0.82 | 0.61 | 0.79 | 0.59 | 0.84 | 0.61 | 0.81 | 0.60 |
|             | <b>GTT</b> | 1.93 | 1.42 | 1.97 | 1.46 | 2.02 | 1.47 | 1.98 | 1.47 | 1.95 | 1.43 | 1.97 | 1.46 | 2.00 | 1.47 | 1.96 | 1.47 | 1.95 | 1.42 | 2.01 | 1.49 |
