# Supplementary material for: Plastid phylogenomics of Pleurothallidinae (Orchidaceae): Conservative plastomes, new variable markers, and comparative analyses of plastid, nuclear, and mitochondrial data
Source: PubMed Central journal article supplement (PMC8396723; doi:10.1371/journal.pone.0256126), 2021-08-27
Supplement: pone.0256126.s013.pdf [file pone.0256126.s013.pdf]

| CDS         | <i>D</i>     | <i>P</i> value   | CDS          | <i>D</i>     | <i>P</i> value   |
|-------------|--------------|------------------|--------------|--------------|------------------|
| <i>accD</i> | <b>-4.36</b> | <b>&lt; 0.01</b> | <i>psbM</i>  | -1.03        | 0.30             |
| <i>atpA</i> | -1.49        | 0.13             | <i>psbN</i>  | -1.40        | 0.16             |
| <i>atpB</i> | <b>-2.61</b> | <b>0.01</b>      | <i>psbT</i>  | <b>-3.55</b> | <b>&lt; 0.01</b> |
| <i>atpE</i> | -0.89        | 0.37             | <i>psbZ</i>  | -0.67        | 0.50             |
| <i>atpF</i> | -1.18        | 0.24             | <i>rbcL</i>  | <b>-2.32</b> | <b>0.02</b>      |
| <i>atpH</i> | -0.96        | 0.34             | <i>rpl2</i>  | -1.01        | 0.31             |
| <i>atpI</i> | -1.51        | 0.13             | <i>rpl14</i> | -0.83        | 0.40             |
| <i>ccsA</i> | -1.60        | 0.11             | <i>rpl16</i> | -0.38        | 0.70             |
| <i>cemA</i> | -1.28        | 0.20             | <i>rpl20</i> | -1.41        | 0.16             |
| <i>clpP</i> | -1.02        | 0.30             | <i>rpl22</i> | <b>-2.03</b> | <b>0.04</b>      |
| <i>infA</i> | -0.03        | 0.98             | <i>rpl23</i> | -1.40        | 0.16             |
| <i>matK</i> | -1.26        | 0.21             | <i>rpl32</i> | <b>-1.96</b> | <b>0.05</b>      |
| <i>petA</i> | -1.17        | 0.24             | <i>rpl33</i> | <b>-1.95</b> | <b>0.05</b>      |
| <i>petB</i> | <b>-3.49</b> | <b>&lt; 0.01</b> | <i>rpl36</i> | -1.40        | 0.16             |
| <i>petD</i> | -1.27        | 0.20             | <i>rpoA</i>  | -1.35        | 0.17             |
| <i>petG</i> | -1.56        | 0.12             | <i>rpoB</i>  | -1.57        | 0.11             |
| <i>petL</i> | -1.40        | 0.16             | <i>rpoC1</i> | <b>-2.20</b> | <b>0.03</b>      |
| <i>petN</i> | -0.69        | 0.49             | <i>rpoC2</i> | -1.44        | 0.15             |
| <i>psaA</i> | -1.58        | 0.11             | <i>rps2</i>  | -1.68        | 0.09             |
| <i>psaB</i> | -1.28        | 0.20             | <i>rps3</i>  | -1.43        | 0.15             |
| <i>psaC</i> | -1.84        | 0.06             | <i>rps4</i>  | -1.65        | 0.10             |
| <i>psaI</i> | -0.63        | 0.53             | <i>rps7*</i> | -            | -                |
| <i>psaJ</i> | 1.13         | 0.26             | <i>rps8</i>  | -1.65        | 0.10             |
| <i>psbA</i> | -1.23        | 0.22             | <i>rps11</i> | -1.50        | 0.13             |
| <i>psbB</i> | <b>-1.91</b> | <b>0.05</b>      | <i>rps12</i> | -1.11        | 0.26             |
| <i>psbC</i> | -0.70        | 0.48             | <i>rps14</i> | -1.01        | 0.31             |
| <i>psbD</i> | -1.15        | 0.25             | <i>rps15</i> | -1.80        | 0.07             |
| <i>psbE</i> | -1.74        | 0.08             | <i>rps16</i> | -1.38        | 0.70             |
| <i>psbF</i> | -1.39        | 0.16             | <i>rps18</i> | <b>-3.58</b> | <b>&lt; 0.01</b> |
| <i>psbH</i> | -1.59        | 0.11             | <i>rps19</i> | -1.39        | 0.16             |
| <i>psbI</i> | 0.01         | 0.99             | <i>ycf1</i>  | <b>-3.22</b> | <b>&lt; 0.01</b> |
| <i>psbJ</i> | -1.40        | 0.16             | <i>ycf2</i>  | <b>-2.19</b> | <b>0.03</b>      |
| <i>psbK</i> | -1.75        | 0.08             | <i>ycf3</i>  | -0.85        | 0.39             |
| <i>psbL</i> | -1.11        | 0.26             | <i>ycf4</i>  | -1.80        | 0.07             |
