# Supplementary material for: Plastid phylogenomics of Pleurothallidinae (Orchidaceae): Conservative plastomes, new variable markers, and comparative analyses of plastid, nuclear, and mitochondrial data
Source: PubMed Central journal article supplement (PMC8396723; doi:10.1371/journal.pone.0256126), 2021-08-27
Supplement: pone.0256126.s014.pdf [file pone.0256126.s014.pdf]

| Plastome                      | SSRs count | SSRs by repeat unit size |    |     |       |       |      | SSRs by location |      |         | SSRs by region |     |     |
|-------------------------------|------------|--------------------------|----|-----|-------|-------|------|------------------|------|---------|----------------|-----|-----|
|                               |            | Mono                     | Di | Tri | Tetra | Penta | Hexa | Exons            | IGSs | Introns | IR             | LSC | SSC |
| <i>Acianthera recurva</i>     | 116        | 33                       | 10 | 58  | 9     | 6     | 0    | 34               | 64   | 18      | 22             | 87  | 7   |
| <i>Anathallis microphyta</i>  | 135        | 59                       | 7  | 57  | 8     | 1     | 3    | 44               | 68   | 23      | 13             | 98  | 25  |
| <i>Anathallis obovata</i>     | 134        | 62                       | 5  | 57  | 8     | 1     | 1    | 41               | 73   | 20      | 17             | 94  | 23  |
| <i>Dryadella lilliputiana</i> | 143        | 65                       | 4  | 62  | 9     | 2     | 1    | 41               | 84   | 18      | 18             | 96  | 29  |
| <i>Masdevallia picturata</i>  | 131        | 51                       | 8  | 61  | 11    | 0     | 0    | 44               | 69   | 18      | 17             | 92  | 22  |
| <i>Myoxanthus exasperatus</i> | 122        | 46                       | 8  | 57  | 7     | 3     | 1    | 38               | 70   | 14      | 19             | 86  | 17  |
| <i>Octomeria grandiflora</i>  | 127        | 56                       | 6  | 57  | 5     | 2     | 1    | 40               | 72   | 15      | 18             | 90  | 19  |
| <i>Pabstiella mirabilis</i>   | 113        | 41                       | 9  | 54  | 6     | 3     | 0    | 40               | 62   | 12      | 16             | 80  | 17  |
| <i>Stelis grandiflora</i>     | 133        | 62                       | 5  | 54  | 10    | 2     | 0    | 41               | 76   | 16      | 16             | 95  | 22  |
| <i>Stelis montserratii</i>    | 136        | 63                       | 8  | 54  | 9     | 2     | 0    | 41               | 80   | 15      | 18             | 98  | 20  |
| <b>Total</b>                  | 1,290      | 538                      | 70 | 571 | 82    | 22    | 7    | 363              | 718  | 209     | 174            | 916 | 200 |
