# Supplementary material for: Plastid phylogenomics of Pleurothallidinae (Orchidaceae): Conservative plastomes, new variable markers, and comparative analyses of plastid, nuclear, and mitochondrial data
Source: PubMed Central journal article supplement (PMC8396723; doi:10.1371/journal.pone.0256126), 2021-08-27
Supplement: pone.0256126.s015.pdf [file pone.0256126.s015.pdf]

| Primer name  | Product size (bp) | Location              | Region | SSR type                       | Primer sequence (5'-3')                                 | Tm (°C)      | % GC         |
|--------------|-------------------|-----------------------|--------|--------------------------------|---------------------------------------------------------|--------------|--------------|
| Pleuro_SSR1  | 341               | <i>psbA-trnK</i> IGS  | LSC    | (T) × 10-17                    | F - TTGCAGAAGCGACCCCATAG<br>R - CGACTAGTTCCGGGTTTCGAG   | 60.1<br>59.9 | 55.0<br>60.0 |
| Pleuro_SSR2  | 422               | <i>psbK-psbI</i> IGS  | LSC    | (A) × 10-15; (ATCTT) × 3-4     | F - AGGGAAGGAGGACGATGATCT<br>R - GGATTACGCCCCGGATCATT   | 59.8<br>60.0 | 52.4<br>55.0 |
| Pleuro_SSR3  | 442               | <i>atpH-atpI</i> IGS  | LSC    | (TAC) × 3                      | F - CAAGCCCTACAGCCAATCCA<br>R - AGCCCACTGCATTATAGATGGA  | 60.0<br>59.0 | 55.0<br>45.0 |
| Pleuro_SSR4  | 421               | <i>atpI-rps2</i> IGS  | LSC    | (TTC) × 3                      | F - TGTTGGCCTACTTCTACACCTG<br>R - GCAATTTGTGAGGGCCGTTTC | 59.7<br>60.4 | 50.0<br>55.0 |
| Pleuro_SSR5  | 365               | <i>rps2-rpoC2</i> IGS | LSC    | (T) × 10-16                    | F - GCCCTTATTGCTGCTGATGC<br>R - CTGGTAGAAGGTTCCGTCGG    | 60.0<br>59.8 | 55.0<br>60.0 |
| Pleuro_SSR6  | 226               | <i>rpoC1</i> intron   | LSC    | (TCC) × 3                      | F - TCATATTCGCTTGCCTTGC<br>R - CCCC GGCTCTGACATGTATC    | 60.0<br>60.0 | 50.0<br>60.0 |
| Pleuro_SSR7  | 296               | <i>trnC-petN</i> IGS  | LSC    | (T) × 10-15                    | F - GGCTCTGAGTGCTGTTCCCTT<br>R - TTAAAGCAGCCCAAGCGAGA   | 60.0<br>60.0 | 55.0<br>50.0 |
| Pleuro_SSR8  | 457               | <i>petN-psbM</i> IGS  | LSC    | (TTA) × 3                      | F - TATGGGGAAGGAGTGGGCTT<br>R - GAATTGCAAGCCCAACTGCT    | 60.3<br>59.7 | 55.0<br>50.0 |
| Pleuro_SSR9  | 498               | <i>trnE-trnT</i> IGS  | LSC    | (AGT) × 3-4 / (GTA) × 3        | F - TGAGCTATCCCATACTCCCAT<br>R - CCACTGAGTTAAAAGGGCCCT  | 57.4<br>59.9 | 47.6<br>52.4 |
| Pleuro_SSR10 | 110               | <i>trnT-psbD</i> IGS  | LSC    | (A) × 10-15; (ATT) / (TTA) × 3 | F - TCTTCGTTTTTCAGCGGGGA<br>R - ACGGGGAAGACTCCTCCTAA    | 59.9<br>59.3 | 50.0<br>55.0 |
| Pleuro_SSR11 | 370               | <i>psaA</i> CDS       | LSC    | (TTG) × 3                      | F - ACGGGAAGTGCAGCAAATA<br>R - ACATCTGAACTGGGCATGCA     | 60.0<br>60.0 | 50.0<br>50.0 |
| Pleuro_SSR12 | 498               | <i>psaA-ycf3</i> IGS  | LSC    | (T) × 10-15                    | F - TGCCAAAGCATTTCAGGA<br>R - GATTCGGAAATTGCGGAGGC      | 60.2<br>60.0 | 50.0<br>55.0 |
| Pleuro_SSR13 | 134               | <i>ycf3</i> intron I  | LSC    | (AAG) / (AAT) × 3              | F - ATACGGCTCCTCCCTTCTGT<br>R - AACCTCTTGTGGGAAGGCTG    | 60.0<br>59.9 | 55.0<br>55.0 |
| Pleuro_SSR14 | 349               | <i>trnT-trnL</i> IGS  | LSC    | (A) × 10-15                    | F - GGGCGGGGATATAAGAGCAA<br>R - TGCTTTCCTCCTCCTTCAT     | 59.3<br>58.3 | 55.0<br>50.0 |
| Pleuro_SSR15 | 361               | <i>trnT-trnL</i> IGS  | LSC    | (AGG) × 3; (AT) × 5-6          | F - AGAATGAATATCGACCGTTCCACT<br>R - AGCGTCTACCAATTCGCCA | 59.9<br>60.0 | 41.7<br>50.0 |
| Pleuro_SSR16 | 419               | <i>trnL-trnF</i> IGS  | LSC    | (T) × 10-13                    | F - ATCGTGAGGGTTCAAGTCCC<br>R - TTCCCGTGCATCATCCTAGC    | 59.4<br>59.9 | 55.0<br>55.0 |
| Pleuro_SSR17 | 476               | <i>ndhC-trnV</i> IGS  | LSC    | (A) × 11-15                    | F - TGTGATGTGTAGACATAGCATGC                             | 58.9         | 43.5         |
|              |                   |                       |        |                                | R - CGGTTTCGAGTCCGTATAGCC                               | 60.0         | 60.0         |
| Pleuro_SSR18 | 517               | <i>atpB-rbcL</i> IGS  | LSC    | (TA) × 4-8                     | F - TACTGTCAAGAGAGGGGGCC<br>R - GCGCAACCAATCTTCGTTT     | 60.6<br>60.0 | 60.0<br>50.0 |

|                     |     |                           |     |                                      |                                                            |              |              |
|---------------------|-----|---------------------------|-----|--------------------------------------|------------------------------------------------------------|--------------|--------------|
| <b>Pleuro_SSR19</b> | 430 | <i>accD</i> CDS           | LSC | (TAT) × 3–4                          | F - ACCGGTGGGAGTGAAGAAAC<br>R - AACGAAGATAACTATCAATGCAACT  | 59.9<br>57.2 | 55.0<br>32.0 |
| <b>Pleuro_SSR20</b> | 454 | <i>accD-psaI</i> IGS      | LSC | (A) × 10–19                          | F - TGGAAGTATATCACTAGCTTCAGTT<br>R - TGAAAAACGGGGGTTTTTCGC | 57.3<br>59.9 | 36.0<br>50.0 |
| <b>Pleuro_SSR21</b> | 450 | <i>accD-psaI</i> IGS      | LSC | (AGA) × 3                            | F - ACCCCCGTTTTTCACTAGGA<br>R - AAGAAGCCATTGCGATTGCC       | 58.6<br>59.8 | 50.0<br>50.0 |
| <b>Pleuro_SSR22</b> | 242 | <i>ycf4-cemA</i> IGS      | LSC | (TAA) × 3–5 / (AAT) × 3              | F - CTTGCGCGTACCCATTGAAG<br>R - AAGAATGAAGCTGGACGCCA       | 59.9<br>60.0 | 55.0<br>50.0 |
| <b>Pleuro_SSR23</b> | 500 | <i>petA-psbJ</i> IGS      | LSC | (T) × 10–19                          | F - GTTTCGGCTGAAAAGCGGAT<br>R - AAGAACTCAGCGGGGTAAGG       | 59.5<br>59.4 | 50.0<br>55.0 |
| <b>Pleuro_SSR24</b> | 388 | <i>petL-trnW</i> IGS      | LSC | (CCT) × 3                            | F - CGCGTCAATTGCCAATTCCT<br>R - GGGTCTCCAAAACCCGATGT       | 59.8<br>60.0 | 50.0<br>55.0 |
| <b>Pleuro_SSR25</b> | 431 | <i>trnP-psaJ</i> IGS      | LSC | (AAG) × 3                            | F - AGCTGCGCTACATCCCTTTT<br>R - CACAGGTGCCGTTGAGAGAT       | 60.0<br>60.0 | 50.0<br>55.0 |
| <b>Pleuro_SSR26</b> | 327 | <i>psaJ-rpl33</i> IGS     | LSC | (A) × 11–18                          | F - ATCTCTCAACGGCACCTGTG<br>R - CGCGCTCCTAGACTGAATCC       | 60.0<br>60.3 | 55.0<br>60.0 |
| <b>Pleuro_SSR27</b> | 461 | <i>rps18-rpl20</i> IGS    | LSC | (AAT) × 10; (CTA) × 3                | F - TTTTCGTAGGCGTTTACCCCC<br>R - GGAGAATGGACTCCGGGAAG      | 60.0<br>59.5 | 55.0<br>60.0 |
| <b>Pleuro_SSR28</b> | 500 | <i>rpl20-rps12</i> IGS    | LSC | (T) × 10–11                          | F - CACCGGAGCCTCTTCTTTCA<br>R - TGCGACTCGTTCAGTTCAGA       | 59.7<br>59.3 | 55.0<br>50.0 |
| <b>Pleuro_SSR29</b> | 476 | <i>clpP</i> CDS; intron I | LSC | (ATAA) × 3; (T) × 10–13              | F - GGTATTACCCATCCGCCTGG<br>R - TTCGGACAAATCTTCCCCCG       | 60.0<br>60.0 | 60.0<br>55.0 |
| <b>Pleuro_SSR30</b> | 413 | <i>clpP</i> intron I      | LSC | (T) × 10–12                          | F - CGGGGGAAGATTTGTCCGAA<br>R - ATCCAGGCTCCGTTTCAGAGA      | 60.0<br>60.3 | 55.0<br>55.0 |
| <b>Pleuro_SSR31</b> | 433 | <i>clpP-psbB</i> IGS      | LSC | (TAT) × 3; (AT) × 6–23 / (TA) × 5–17 | F - TGGAAACGTAACAATGGTTTTATTG<br>R - GACTGATCCGATCGATCCCG  | 57.1<br>59.8 | 32.0<br>60.0 |
| <b>Pleuro_SSR32</b> | 585 | <i>psbB-psbT</i> IGS      | LSC | (T) × 11–16                          | F - GCGCCAGAACCTTGTTTCAGA<br>R - GCTTCCACACCTATTCATTTTGGA  | 60.9<br>59.5 | 55.0<br>41.7 |
| <b>Pleuro_SSR33</b> | 206 | <i>petD</i> intron        | LSC | (T) × 11–19                          | F - ACAGGCTCCGTAAGATCCCT<br>R - GATCAGGGTCGATGCAGAGG       | 60.0<br>60.0 | 55.0<br>60.0 |
| <b>Pleuro_SSR34</b> | 456 | <i>rpoA</i> CDS           | LSC | (TCT) × 3–4                          | F - GTGCTTCTGTAGAGTGCCCA<br>R - TCTATGCCTGTTTCGAAATGCG     | 59.7<br>59.1 | 55.0<br>47.6 |
| <b>Pleuro_SSR35</b> | 308 | <i>rpl36-infA</i> IGS     | LSC | (T) × 10–19                          | F - ATAATTCGACCCCGCCTACG<br>R - TCCGGCGCAGTTTTATACGT       | 59.7<br>60.1 | 55.0<br>50.0 |
| <b>Pleuro_SSR36</b> | 294 | <i>rpl36-infA</i> IGS     | LSC | (T) × 10–17                          | F - TGTCCCTACCCATGACGAAC<br>R - TTTTGGTGCAATTGCTCGGG       | 59.1<br>60.0 | 55.0<br>50.0 |
| <b>Pleuro_SSR37</b> | 422 | <i>rpl14-rpl16</i> IGS    | LSC | (CTT) × 3–4 / (TCT) × 3              | F - TGAGCTCCACTGTTATCCGC<br>R - TATGCACGTCGTGGTGGAAA       | 59.8<br>60.0 | 55.0<br>50.0 |

|                     |     |                       |     |                         |                                                                 |              |              |
|---------------------|-----|-----------------------|-----|-------------------------|-----------------------------------------------------------------|--------------|--------------|
| <b>Pleuro_SSR38</b> | 347 | <i>rpl16</i> intron   | LSC | (CTT) × 3–4 / (TCT) × 3 | F - GCTTAGGCCTGAACTCTGCA<br>R - GGCAGTGTATCAAGCATCAACA          | 60.0<br>59.8 | 55.0<br>43.5 |
| <b>Pleuro_SSR39</b> | 481 | <i>ycf2</i> CDS       | IR  | (CTT) × 3               | F - TGCGTTGAGAAAGGGCAGAT<br>R - ACTCACTAGAGGCTCGGGAA            | 60.0<br>59.7 | 50.0<br>55.0 |
| <b>Pleuro_SSR40</b> | 293 | <i>ycf2</i> CDS       | IR  | (TGA) × 3               | F - AACCCCTTTTCGCTCCGCTTA<br>R - TGGGTCTATTTTCGGCGTCA           | 60.0<br>59.4 | 50.0<br>50.0 |
| <b>Pleuro_SSR41</b> | 410 | <i>ycf2</i> CDS       | IR  | (CTT) × 3               | F - TGACGCCGAAAATAGACCCA<br>R - TGCTACAAGATCTCGCGCAT            | 59.4<br>59.9 | 50.0<br>50.0 |
| <b>Pleuro_SSR42</b> | 353 | <i>ycf2</i> CDS       | IR  | (GAA) × 3               | F - ATGCGCGAGATCTTGTAGCA<br>R - CGATCCGGCAGAACAACACTCA          | 59.9<br>60.4 | 50.0<br>55.0 |
| <b>Pleuro_SSR43</b> | 500 | <i>rps12-trnV</i> IGS | IR  | (CTT) × 3               | F - CCTCATACGGCTCCTCGTTC<br>R - CCCCTCGCTCGATGAGAAAA            | 60.0<br>59.8 | 60.0<br>55.0 |
| <b>Pleuro_SSR44</b> | 375 | <i>rps12-trnV</i> IGS | IR  | (TCC) × 3               | F - TTCTCATCGAGCGAGGGGTA<br>R - CCCTTACGCAATCGATCGGA            | 60.1<br>60.0 | 55.0<br>55.0 |
| <b>Pleuro_SSR45</b> | 432 | <i>rps12-trnV</i> IGS | IR  | (T) × 10–13             | F – TTGGCGCAAGAATAAGGGGT<br>R - TGACTTCCACCACGTCAAGG            | 60.0<br>59.9 | 50.0<br>55.0 |
| <b>Pleuro_SSR46</b> | 281 | <i>ycf1</i> CDS       | IR  | (CAA) × 3               | F – ACCAAGTTCCACGTTAGCCA<br>R - TAGTGACAATAGGCGACGGC            | 59.5<br>59.9 | 50.0<br>55.0 |
| <b>Pleuro_SSR47</b> | 398 | <i>ndhF</i> CDS       | SSC | (CAA) × 3               | F – GGTCGTGTGAACCAAAGCC<br>R - CGTCGTATGTGGGCTTTCCT             | 60.0<br>60.1 | 55.0<br>55.0 |
| <b>Pleuro_SSR48</b> | 290 | <i>rpl32-ccsA</i> IGS | SSC | (TTA) × 3–6 / (ATT) × 3 | F – ACCCCGACTGAGAACGAAAC<br>R - TGCTTCCTAAGAGCAGCGTG            | 60.0<br>60.4 | 55.0<br>55.0 |
| <b>Pleuro_SSR49</b> | 260 | <i>ndhE-ndhG</i> IGS  | SSC | (A) × 10–14             | F – TGCTTCGGCTTGTGATCAGT<br>R - AGGTGCAATTAATGACTGCTCGT         | 60.0<br>59.8 | 50.0<br>45.5 |
| <b>Pleuro_SSR50</b> | 405 | <i>ycf1</i> CDS       | SSC | (T) × 10–11             | F – TGACTCATAAATGAATTCGCTGCA<br>R - ATCTTCCCTGTCCCAAGCAT        | 59.4<br>58.7 | 37.5<br>50.0 |
| <b>Pleuro_SSR51</b> | 405 | <i>ycf1</i> CDS       | SSC | (A) × 10                | F – AACGGACGATTCGCGAAGAA<br>R - GTCTGGGGAAAGGAAGCGAA            | 60.4<br>60.0 | 50.0<br>55.0 |
| <b>Pleuro_SSR52</b> | 422 | <i>ycf1</i> CDS       | SSC | (TTA) × 3               | F – CCTCATCCCACTCAGTAATTTGGA<br>R - AGGATCTATGCGCGCTCAAA        | 60.1<br>59.9 | 45.8<br>50.0 |
| <b>Pleuro_SSR53</b> | 464 | <i>ycf1</i> CDS       | SSC | (T) × 12–14; (TCA) × 3  | F – CCTCTTCTCCCAATTCTCCCA<br>R - TGAGAGATCCCCTAGTCTGGA          | 58.8<br>58.5 | 52.4<br>52.4 |
| <b>Pleuro_SSR54</b> | 300 | <i>ycf1</i> CDS       | SSC | (T) × 10–11; (A) × 12   | F – GGATTCGACTTCTCAATTCATTGT<br>R - CTTTTCTTTTCGATTATAAACGATGGA | 57.6<br>57.0 | 37.5<br>29.6 |
