# Supplementary material for: Plastid phylogenomics of Pleurothallidinae (Orchidaceae): Conservative plastomes, new variable markers, and comparative analyses of plastid, nuclear, and mitochondrial data
Source: PubMed Central journal article supplement (PMC8396723; doi:10.1371/journal.pone.0256126), 2021-08-27
Supplement: pone.0256126.s016.pdf [file pone.0256126.s016.pdf]

| Sequence name                                | SV (%) | Location | Region | Length (bp) | GC (%) |
|----------------------------------------------|--------|----------|--------|-------------|--------|
| <i>psbI-trnS<sup>GCU</sup></i>               | 41.67  | IGS      | LSC    | 158         | 22.8   |
| <i>ndhF-rpl32</i>                            | 41.19  | IGS      | SSC    | 1149        | 18.5   |
| <i>psbB-psbT</i>                             | 38.76  | IGS      | LSC    | 610         | 19.5   |
| <i>trnS<sup>GCU</sup>-trnG<sup>UCC</sup></i> | 36.19  | IGS      | LSC    | 1334        | 26.5   |
| <i>rpl32-trnL<sup>UAG</sup></i>              | 33.88  | IGS      | SSC    | 996         | 23.8   |
| <i>trnR<sup>UCU</sup>-atpA</i>               | 31.94  | IGS      | LSC    | 224         | 23.4   |
| <i>trnW<sup>CCA</sup>-trnP<sup>UGG</sup></i> | 30.61  | IGS      | LSC    | 200         | 30.8   |
| <i>petN-psbM</i>                             | 29.78  | IGS      | LSC    | 1034        | 25.6   |
| <i>rpl16-rps3</i>                            | 29.68  | IGS      | LSC    | 192         | 22.2   |
| <i>psbK-psbI</i>                             | 29.63  | IGS      | LSC    | 611         | 25.1   |
| <i>atpB-rbcL</i>                             | 29.04  | IGS      | LSC    | 1319        | 23.9   |
| <i>clpP-psbB</i>                             | 28.38  | IGS      | LSC    | 1111        | 24.0   |
| <i>rps8-rpl14</i>                            | 28.13  | IGS      | LSC    | 265         | 21.1   |
| <i>psbM-trnD<sup>GUC</sup></i>               | 26.95  | IGS      | LSC    | 1370        | 30.9   |
| <i>atpF-atpH</i>                             | 26.58  | IGS      | LSC    | 183         | 26.3   |
| <i>rps15-ycf1</i>                            | 26.53  | IGS      | SSC    | 459         | 24.0   |
| <i>trnG<sup>UCC</sup>-trnR<sup>UCU</sup></i> | 26.50  | IGS      | LSC    | 166         | 24.7   |
| <i>trnP<sup>UGG</sup>-psaJ</i>               | 26.29  | IGS      | LSC    | 497         | 23.9   |
| <i>atpH-atpI</i>                             | 26.27  | IGS      | LSC    | 809         | 30.0   |
| <i>trnT<sup>UGU</sup>-trnL<sup>UAA</sup></i> | 25.50  | IGS      | LSC    | 734         | 26.9   |
| <i>trnE<sup>UUC</sup>-trnT<sup>GGU</sup></i> | 25.32  | IGS      | LSC    | 854         | 24.7   |
| <i>accD-psaI</i>                             | 24.54  | IGS      | LSC    | 887         | 27.2   |
| <i>ndhC-trnV<sup>UAC</sup></i>               | 24.51  | IGS      | LSC    | 830         | 25.4   |
| <i>trnG<sup>GCC</sup>-trnM<sup>CAU</sup></i> | 24.34  | IGS      | LSC    | 215         | 32.6   |
| <i>trnF<sup>GAA</sup>-ndhJ</i>               | 24.00  | IGS      | LSC    | 191         | 27.2   |
| <i>trnK<sup>UUU</sup>-matK</i>               | 23.95  | intron   | LSC    | 311         | 29.0   |
| <i>ycf4-cemA</i>                             | 22.84  | IGS      | LSC    | 832         | 31.1   |
| <i>trnD<sup>GUC</sup>-trnY<sup>GAA</sup></i> | 22.53  | IGS      | LSC    | 403         | 29.6   |
| <i>rps16-trnQ<sup>UUG</sup></i>              | 22.39  | IGS      | LSC    | 479         | 26.8   |
| <i>trnK<sup>UUU</sup>-rps16</i>              | 22.33  | IGS      | LSC    | 605         | 27.6   |
| <i>psaC-ndhE</i>                             | 22.03  | IGS      | SSC    | 610         | 21.7   |
| <i>psbA-trnK<sup>UUU</sup></i>               | 21.93  | IGS      | LSC    | 275         | 28.0   |
| <i>rpl33-rps18</i>                           | 21.47  | IGS      | LSC    | 214         | 27.5   |
| <i>matK- trnK<sup>UUU</sup></i>              | 21.36  | intron   | LSC    | 1305        | 28.5   |
| <i>petA-psbJ</i>                             | 21.35  | IGS      | LSC    | 1163        | 28.8   |
| <i>rpl16</i>                                 | 21.23  | intron   | LSC    | 1484        | 27.9   |
| <i>ccsA-ndhD</i>                             | 21.09  | IGS      | SSC    | 297         | 23.8   |
| <i>psbC-trnS<sup>UGA</sup></i>               | 21.01  | IGS      | LSC    | 150         | 35.3   |
| <i>trnT<sup>GGU</sup>-psbD</i>               | 20.77  | IGS      | LSC    | 1006        | 33.7   |
| <i>ndhE-ndhG</i>                             | 20.65  | IGS      | SSC    | 161         | 22.5   |
| <i>psbE-petL</i>                             | 20.39  | IGS      | LSC    | 1320        | 27.6   |
| <i>psbZ-trnG<sup>GCC</sup></i>               | 20.31  | IGS      | LSC    | 328         | 31.3   |
| <i>trnL<sup>UAA</sup>-trnF<sup>GAA</sup></i> | 20.24  | IGS      | LSC    | 441         | 30.9   |
| <i>ycf1 (3' portion)</i>                     | 20.05  | CDS      | SSC    | 4541        | 27.5   |
| <i>trnH<sup>GUG</sup>-psbA</i>               | 19.94  | IGS      | IR/LSC | 820         | 34.8   |
| <i>psaJ-rpl33</i>                            | 19.90  | IGS      | LSC    | 710         | 25.8   |
| <i>trnQ<sup>UUG</sup>-psbK</i>               | 19.85  | IGS      | LSC    | 390         | 23.4   |
| <i>ndhA</i>                                  | 19.59  | intron   | SSC    | 1181        | 30.4   |
| <i>trnL<sup>UAG</sup>-ccsA</i>               | 19.49  | IGS      | SSC    | 160         | 18.7   |
| <i>atpI-rps2</i>                             | 19.35  | IGS      | LSC    | 309         | 25.6   |
| <i>psbH-petB</i>                             | 19.35  | IGS      | LSC    | 226         | 26.3   |
| <i>rps18-rpl20</i>                           | 19.25  | IGS      | LSC    | 274         | 30.9   |
| <i>petL-petG</i>                             | 19.17  | IGS      | LSC    | 192         | 29.8   |
| <i>rpoB-trnC<sup>GCA</sup></i>               | 18.97  | IGS      | LSC    | 1537        | 30.4   |
| <i>ndhG-ndhI</i>                             | 18.92  | IGS      | SSC    | 246         | 27.0   |
| <i>ycf3-trnS<sup>GGA</sup></i>               | 18.83  | IGS      | LSC    | 620         | 31.5   |
| <i>rpl22-rps19</i>                           | 18.60  | IGS      | IR     | 270         | 30.0   |
| <i>trnL<sup>UAA</sup></i>                    | 18.56  | intron   | LSC    | 827         | 30.2   |

|                                              |       |        |     |      |      |
|----------------------------------------------|-------|--------|-----|------|------|
| <i>rbcL-accD</i>                             | 18.33 | IGS    | LSC | 922  | 30.6 |
| <i>trnC<sup>GCA</sup>-petN</i>               | 17.81 | IGS    | LSC | 875  | 33.6 |
| <i>rpoC2-rpoC1</i>                           | 17.51 | IGS    | LSC | 205  | 36.9 |
| <i>trnFM<sup>CAU</sup>-rps14</i>             | 17.50 | IGS    | LSC | 172  | 35.1 |
| <i>rps4-trnT<sup>UGU</sup></i>               | 17.42 | IGS    | LSC | 365  | 27.8 |
| <i>psaA-ycf3</i>                             | 17.35 | IGS    | LSC | 668  | 29.8 |
| <i>trnS<sup>GGA</sup>-rps4</i>               | 17.26 | IGS    | LSC | 400  | 28.6 |
| <i>psaI-ycf4</i>                             | 17.26 | IGS    | LSC | 435  | 31.3 |
| <i>petD-rpoA</i>                             | 16.67 | IGS    | LSC | 191  | 29.7 |
| <i>rps2-rpoC2</i>                            | 16.67 | IGS    | LSC | 238  | 31.5 |
| <i>clpP II</i>                               | 16.57 | intron | LSC | 1068 | 30.7 |
| <i>rps16</i>                                 | 16.20 | intron | LSC | 983  | 31.7 |
| <i>rps11-rpl36</i>                           | 15.85 | IGS    | LSC | 197  | 25.5 |
| <i>atpF</i>                                  | 15.70 | intron | LSC | 999  | 30.7 |
| <i>petB-petD</i>                             | 13.89 | IGS    | LSC | 197  | 31.3 |
| <i>clpP I</i>                                | 12.88 | intron | LSC | 716  | 30.8 |
| <i>petD</i>                                  | 12.81 | intron | LSC | 949  | 33.1 |
| <i>trnM<sup>CAU</sup>-atpE</i>               | 12.70 | IGS    | LSC | 198  | 29.4 |
| <i>rpl20-rps12</i>                           | 12.45 | IGS    | LSC | 838  | 34.9 |
| <i>cemA-petA</i>                             | 12.14 | IGS    | LSC | 255  | 30.3 |
| <i>trnV<sup>UAC</sup>-trnM<sup>CAU</sup></i> | 11.30 | IGS    | LSC | 178  | 32.4 |
| <i>trnG<sup>UCC</sup></i>                    | 10.68 | intron | LSC | 709  | 31.4 |
| <i>matK</i>                                  | 10.58 | CDS    | LSC | 1542 | 32.2 |
| <i>trnS<sup>UGA</sup>-psbZ</i>               | 10.57 | IGS    | LSC | 233  | 33.1 |
| <i>petB</i>                                  | 10.47 | intron | LSC | 744  | 34.1 |
| <i>rpoC1</i>                                 | 10.30 | intron | LSC | 791  | 36.3 |
| <i>trnR<sup>ACG</sup>-trnN<sup>GUU</sup></i> | 09.68 | IGS    | IR  | 585  | 42.2 |
| <i>ycf3 II</i>                               | 09.18 | intron | LSC | 734  | 36.0 |
| <i>ycf3 I</i>                                | 08.66 | intron | LSC | 814  | 32.8 |
| <i>ndhD-psaC</i>                             | 08.21 | IGS    | SSC | 152  | 34.5 |
| <i>trnL<sup>CAA</sup>-ndhB</i>               | 07.20 | IGS    | IR  | 588  | 37.1 |
| <i>trnV<sup>UAC</sup></i>                    | 06.84 | intron | LSC | 589  | 39.6 |
| <i>ycf2-trnI<sup>CAU</sup></i>               | 06.25 | IGS    | IR  | 999  | 42.7 |
| <i>rps12-trnV<sup>GAC</sup></i>              | 06.23 | IGS    | IR  | 2005 | 39.7 |
| <i>rpl23-trnI<sup>CAU</sup></i>              | 05.16 | IGS    | IR  | 165  | 34.6 |
| <i>rrn5-trnR<sup>ACG</sup></i>               | 05.00 | IGS    | IR  | 247  | 41.3 |
| <i>rrn16-trnI<sup>GAU</sup></i>              | 04.76 | IGS    | IR  | 294  | 50.6 |
| <i>trnN<sup>GUU</sup>-ycf1</i>               | 04.04 | IGS    | IR  | 357  | 38.1 |
| <i>rrn4.5-rrn5</i>                           | 03.70 | IGS    | IR  | 217  | 46.3 |
| <i>ndhB</i>                                  | 03.07 | intron | IR  | 705  | 39.3 |
| <i>ndhB-rps7</i>                             | 02.52 | IGS    | IR  | 341  | 35.4 |
| <i>rps12</i>                                 | 02.01 | intron | IR  | 547  | 39.7 |
| <i>trnA<sup>UGC</sup></i>                    | 01.99 | intron | IR  | 809  | 50.9 |
| <i>trnI<sup>GAU</sup></i>                    | 01.71 | intron | IR  | 939  | 49.2 |
| <i>trnV<sup>GAC</sup>-rrn16</i>              | 01.71 | IGS    | IR  | 243  | 45.9 |
| <i>rpl2</i>                                  | 01.20 | intron | IR  | 665  | 40.6 |
