# Supplementary material for: Plastid phylogenomics of Pleurothallidinae (Orchidaceae): Conservative plastomes, new variable markers, and comparative analyses of plastid, nuclear, and mitochondrial data
Source: PubMed Central journal article supplement (PMC8396723; doi:10.1371/journal.pone.0256126), 2021-08-27
Supplement: pone.0256126.s017.pdf [file pone.0256126.s017.pdf]

| Sequence                                     | SV    | Region | Primer sequence (5'–3')                     | Tm (°C) | %GC  | Product size (bp) |
|----------------------------------------------|-------|--------|---------------------------------------------|---------|------|-------------------|
| <i>ndhF-rpl32</i>                            | 41.19 | SSC    | ndhF* – CCAATATCCCTYYTTTCCAA [79]           | 60.0    | 52.4 | -                 |
|                                              |       |        | rpl32R* – CCAATATCCCTYYTTTCCAA [79]         | 60.0    | 50.0 |                   |
|                                              |       |        | Pleuro_ndhF-F – AGGAAAGCCCACATACGACG        | 60.1    | 55.0 | 1068              |
|                                              |       |        | Pleuro_rpl32-R – ACTTTTTGACTGTCCGGTGGA      | 59.8    | 47.6 |                   |
| <i>petN-psbM</i>                             | 29.78 | LSC    | Pleuro_petN-F – TCTCGCTTGGGCTGCTTTAA        | 60.0    | 50.0 | 973               |
|                                              |       |        | Pleuro_psbM-R – GCGCTTATTGCTACTACGCTG       | 59.8    | 52.4 |                   |
| <i>psbB-psbT</i>                             | 38.76 | LSC    | Pleuro_psbB-F – TGCTACGTTTGCTTTGCTCT        | 58.4    | 45.0 | 800               |
|                                              |       |        | Pleuro_psbT-R – GGGGGCTCATTACTTCAATGGA      | 60.1    | 50.0 |                   |
| <i>psbI-trnS<sup>GCU</sup></i>               | 41.67 | LSC    | Pleuro_psbI-F – AATGATCCGGGGCGTAATCC        | 60.0    | 55.0 | 266               |
|                                              |       |        | Pleuro_trnS(GCU)-R – ATGGGGAGAGATGGCTGAGT   | 60.0    | 55.0 |                   |
| <i>psbK-psbI</i>                             | 29.63 | LSC    | psbK – TTAGCCTTTGTTTGCAAG [80]              | 54.1    | 42.1 | -                 |
|                                              |       |        | psbI* – AGAGTTTGAGAGTAAGCAT [80]            | 50.7    | 36.8 |                   |
|                                              |       |        | Pleuro_psbI-R – GGATTACGCCCCGGATCATT        | 60.0    | 55.0 | 699               |
| <i>rpl16-rps3</i>                            | 29.68 | LSC    | Pleuro_rpl16-F – AACGAGTCACACTGAGCA         | 59.5    | 50.0 | 337               |
|                                              |       |        | Pleuro_rps3-R – TGCACGTGTCGAATGGATCA        | 60.0    | 50.0 |                   |
| <i>rpl32-trnL<sup>UAG</sup></i>              | 33.88 | SSC    | rpl32-F – CAGTTCCAAAAAACGTACTTC [79]        | 54.5    | 36.4 | -                 |
|                                              |       |        | trnL_UAG – CTGCTTCCTAAGAGCAGCGT [79]        | 60.1    | 55.0 |                   |
| <i>trnR<sup>UCU</sup>-atpA</i>               | 31.94 | LSC    | Pleuro_trnR(UCU)-F – AATGAAGGGCGTCCATTGTCT  | 60.0    | 47.6 | 700               |
|                                              |       |        | Pleuro_atpA-R – GCTGGAATCAGGCCTGCTAT        | 59.9    | 55.0 |                   |
| <i>trnS<sup>GCU</sup>-trnG<sup>UCC</sup></i> | 36.19 | LSC    | trnS* – AGATAGGGATTCTGAACCCTCG [79]         | 58.8    | 52.4 | -                 |
|                                              |       |        | trnG* – GTAGCGGGAATCGAACCCGCATC [79]        | 65.8    | 60.9 |                   |
|                                              |       |        | Pleuro_trnS(GCU)-F – ACGCTTTAGTCCACTCAGCC   | 60.0    | 55.0 | 1336              |
| Pleuro_trnG(UCC)-R – AGCCGAGGGTTCTAGTAAACC   | 59.2  | 52.4   |                                             |         |      |                   |
| <i>trnW<sup>CCA</sup>-trnP<sup>UGG</sup></i> | 30.61 | LSC    | Pleuro_trnW(CCA)-F – ATTTGAACCTACGACATCGGGT | 59.8    | 45.5 | 300               |
|                                              |       |        | Pleuro_trnP(UGG)-R – GCTTGGTAGCGCGTTTGT     | 60.3    | 50.0 |                   |
